# Supplementary material
Source: PubMed Central journal article supplement (PMC3762946)
Supplement: NIHMS367655-supplement-supplement_1.pdf [file NIHMS367655-supplement-supplement_1.pdf]

## **LIST OF SUPPLEMENTAL CONTENT**

Supplemental Content 1: File name 'Ethun\_Breast Effects of Bazedoxifene with CEE\_Supplemental Content 1.ppt'. Figure displaying mRNA expression of *MKI67* (A) and *PGR* (B).

Supplemental Content 2: File name 'Ethun\_Breast Effects of Bazedoxifene with CEE\_Supplemental Content 2.doc'. Table displaying '*Genes Regulated by 0.45 mg/d CEE treatment in the Breast*'.

Supplemental Content 3: File name 'Ethun\_Breast Effects of Bazedoxifene with CEE\_Supplemental Content 3.doc'. Table displaying '*Bazedoxifene-agonized Genes in BZA+CEE Co-therapy*'.

Supplemental Content 4: File name 'Ethun\_Breast Effects of Bazedoxifene with CEE\_Supplemental Content 4.doc'. Table displaying '*Treatment Effects of Bazedoxifene and CEE on Genes Related to Estrogen Metabolism*'

## SUPPLEMENTAL CONTENT 1 (REVISION).

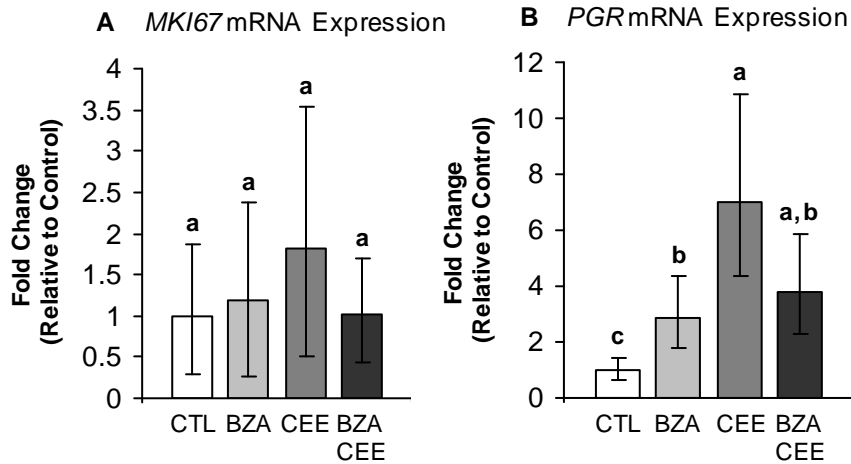

Relative gene expression of progesterone receptor (*PGR*) and the proliferation marker, *MKI67*. (A) No significant difference in *MKI67* expression was observed among treatment groups (non-parametric Kruskal-Wallis). (B) Treatment with BZA, CEE, and BZA+CEE significantly increased *PGR* expression relative to control ( $P < 0.01$  for all). A trend for a significant difference in *PGR* expression was observed between CEE and BZA+CEE ( $P = 0.051$ , ANOVA). Values represent means  $\pm$  95% CI. Treatment groups not connected by the same letter are significantly different.

## SUPPLEMENTAL CONTENT 2.

*Genes Regulated by 0.45 mg/d CEE treatment in the Breast<sup>a</sup>*

| Gene Symbol     | Gene Name                                                                 | CEE-regulated Direction vs. Control |
|-----------------|---------------------------------------------------------------------------|-------------------------------------|
| <b>IGFBP1</b>   | <b>Insulin-like growth factor binding protein 1</b>                       | <b>Up</b>                           |
| <i>C1orf173</i> | Chromosome 1 open reading frame 173                                       | Up                                  |
| <b>TFF1</b>     | <b>Trefoil factor 1</b>                                                   | <b>Up</b>                           |
| <i>MCCC2</i>    | Methylcrotonoyl-Coenzyme A carboxylase 2 (beta)                           | Up                                  |
| <b>TFF3</b>     | <b>Trefoil factor 3 (intestinal)</b>                                      | <b>Up</b>                           |
| <b>PGR</b>      | <b>Progesterone receptor<sup>b</sup></b>                                  | <b>Up</b>                           |
| <i>HIST3H2A</i> | Histone cluster 3, H2a                                                    | Up                                  |
| <i>ASPN</i>     | Asporin                                                                   | Up                                  |
| <i>SGK493</i>   | Protein kinase-like protein SgK493                                        | Up                                  |
| <i>KLK11</i>    | Kallikrein-related peptidase 11                                           | Up                                  |
| <b>GREB1</b>    | <b>GREB1 protein</b>                                                      | <b>Up</b>                           |
| <b>IGSF1</b>    | <b>Immunoglobulin superfamily, member 1</b>                               | <b>Up</b>                           |
| <i>KLK12</i>    | Kallikrein-related peptidase 12                                           | Up                                  |
| <b>PPM1K</b>    | <b>Protein phosphatase, Mg<sup>2+</sup>/Mn<sup>2+</sup> dependent, 1K</b> | <b>Up</b>                           |
| <i>SYT13</i>    | Synaptotagmin XIII                                                        | Up                                  |
| <i>PACRG</i>    | PARK2 co-regulated                                                        | Up                                  |
| <i>MAGED2</i>   | Melanoma antigen family D, 2                                              | Up                                  |
| <i>C2orf80</i>  | Chromosome 2 open reading frame 80                                        | Up                                  |
| <i>CLGN</i>     | Calmegin                                                                  | Up                                  |
| <b>STC2</b>     | <b>Stanniocalcin 2</b>                                                    | <b>Up</b>                           |
| <i>CACNA1D</i>  | Ca <sup>++</sup> channel, voltage-dependent, L type, alpha 1D subunit     | Up                                  |
| <b>RET</b>      | <b>Ret proto-oncogene</b>                                                 | <b>Up</b>                           |
| <i>NTNG1</i>    | Netrin G1                                                                 | Up                                  |
| <i>CSRNP3</i>   | Cysteine-serine-rich nuclear protein 3                                    | Up                                  |
| <i>NR2C2</i>    | Nuclear receptor subfamily 2, group C, member 2                           | Down                                |
| <i>SLC4A8</i>   | Solute carrier family 4, sodium bicarbonate cotransporter, member 8       | Up                                  |
| <i>DACHI</i>    | Dachshund homolog 1 (Drosophila)                                          | Up                                  |
| <b>IRS1</b>     | <b>Insulin receptor substrate 1</b>                                       | <b>Up</b>                           |
| <i>FXYP3</i>    | FXYP domain containing ion transport regulator 3                          | Up                                  |
| <i>RNASE1</i>   | Ribonuclease, RNase A family, 1 (pancreatic)                              | Up                                  |
| <i>DDX4</i>     | DEAD (Asp-Glu-Ala-Asp) box polypeptide 4                                  | Up                                  |
| <b>MYB</b>      | <b>V-myb myeloblastosis viral oncogene homolog (avian)</b>                | <b>Up</b>                           |
| <i>TFCP2L1</i>  | Transcription factor CP2-like 1                                           | Down                                |
| <i>AGR2</i>     | Anterior gradient homolog 2 (Xenopus laevis)                              | Up                                  |
| <i>C4orf30</i>  | Chromosome 4 open reading frame 30                                        | Down                                |
| <i>UQCRC2</i>   | Ubiquinol-cytochrome c reductase core protein II <sup>c</sup>             | Up                                  |
| <i>NELL1</i>    | NEL-like 1 (chicken)                                                      | Up                                  |
| <i>IL22RA2</i>  | Interleukin 22 receptor, alpha 2                                          | Down                                |

<sup>a</sup> Gene names are listed in descending order of significance level (pair-wise comparison between control and CEE-alone, fold change > 2, adjusted *P* values 0.01 – 0.05).

<sup>b</sup> Commonly up-regulated by BZA treatment compared to control.

<sup>c</sup> Contrarily down-regulated by BZA+CEE treatment compared to control.

Bold terms represent genes well-known to be up-regulated by estrogen therapy in human breast cancer cells.<sup>40-42</sup> N = 4 for each treatment group.

**SUPPLEMENTAL CONTENT 3.***Bazedoxifene-agonized Genes in BZA+CEE Co-therapy*<sup>a</sup>

| Gene Symbol     | Gene Name                                                                    | Fold Change<br>CEE vs. BZA/CEE |
|-----------------|------------------------------------------------------------------------------|--------------------------------|
| <i>IGHA1</i>    | Immunoglobulin heavy constant alpha 1                                        | 3.28                           |
| <i>CCL5</i>     | Chemokine (C-C motif) ligand 5                                               | 2.79                           |
| <i>MDM4</i>     | Mdm4 p53 binding protein homolog (mouse)                                     | 2.67                           |
| <i>GZMK</i>     | Granzyme K (granzyme 3, tryptase III)                                        | 2.49                           |
| <i>UBD</i>      | Ubiquitin D                                                                  | 2.31                           |
| <i>HLA-DPA1</i> | Major histocompatibility complex, class II, DP alpha 1                       | 2.21                           |
| <i>GZMB</i>     | Granzyme B (granzyme 2, cytotoxic T-lymphocyte-associated serine esterase 1) | 2.10                           |

<sup>a</sup> Filtered dataset generated in Genesifter software program using a pair-wise comparison between CEE and BZA+CEE at a fold change (FC) > 2, adjusted  $P < 0.05$ , Benjamini & Hochberg correction. All genes were not significantly regulated by BZA, CEE, and BZA+CEE compared to control, except for *IGHA1* (CEE down-regulated compared to control, FC 3.58). N = 4 for each treatment group.

**SUPPLEMENTAL CONTENT 4.** *Treatment Effects of Bazedoxifene and CEE on Genes Related to Estrogen Metabolism*<sup>a</sup>

|                | Control               | BZA<br>20 mg/d        | CEE<br>0.45 mg/d      | BZA + CEE<br>20 mg/d + 0.45 mg/d | <i>P</i> value<br>(ANOVA) |
|----------------|-----------------------|-----------------------|-----------------------|----------------------------------|---------------------------|
| <i>CYP19</i>   | 1.00<br>(0.71 - 1.33) | 0.78<br>(0.59 - 0.99) | 0.65<br>(0.45 - 0.87) | 0.98<br>(0.73 - 1.27)            | 0.105                     |
| <i>HSD17B1</i> | 1.00<br>(0.77 - 1.25) | 1.25<br>(0.79 - 1.79) | 1.05<br>(0.81 - 1.32) | 1.32<br>(0.94 - 1.75)            | 0.498                     |
| <i>HSD17B2</i> | 1.00<br>(0.71 - 1.33) | 1.70<br>(1.09 - 2.48) | 1.65<br>(1.09 - 2.33) | 1.88<br>(1.28 - 2.63)            | 0.102                     |
| <i>STS</i>     | 1.00<br>(0.73 - 1.31) | 1.03<br>(0.77 - 1.32) | 0.92<br>(0.70 - 1.16) | 1.15<br>(0.84 - 1.51)            | 0.665                     |
| <i>SULT1E1</i> | 1.00<br>(0.72 - 1.31) | 0.97<br>(0.71 - 1.27) | 0.90<br>(0.64 - 1.21) | 1.21<br>(0.87 - 1.60)            | 0.492                     |
| N              | 22                    | 22                    | 24                    | 25                               |                           |

<sup>a</sup> Values represented as means (95% CI); expressed relative to control (1.0)
